# Supplementary material for: Resveratrol-Loaded Nanoemulsions: In Vitro Activity on Human T24 Bladder Cancer Cells
Source: MDPI journal article supplement (doi:10.3390/nano11061569), 2021-06-15
Supplement: s1 [file s1]

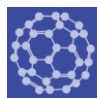

## Article

# Resveratrol-Loaded Nanoemulsions: In Vitro Activity on Human T24 Bladder Cancer Cells

Federica Rinaldi <sup>1,†</sup>, Linda Maurizi <sup>2,†</sup>, Jacopo Forte <sup>1</sup>, Massimiliano Marazzato <sup>2</sup>, Patrizia Nadia Hanieh <sup>1</sup>, Antonietta Lucia Conte <sup>2</sup>, Maria Grazia Ammendolia <sup>3,\*</sup>, Carlotta Marianecchi <sup>1,\*</sup>, Maria Carafa <sup>1,†</sup> and Catia Longhi <sup>2,†</sup>

<sup>1</sup> Dipartimento di Chimica e Tecnologie del Farmaco, Sapienza Università di Roma, P.le A. Moro 5, 00185 Roma, Italy; federica.rinaldi@uniroma1.it (F.R.); jacopo.forte@uniroma1.it (J.F.); patrizianadia.hanieh@uniroma1.it (P.N.H.); maria.carafa@uniroma1.it (M.C.)

<sup>2</sup> Dipartimento di Sanità pubblica e Malattie infettive, Sapienza Università di Roma, P.le A. Moro 5, 00185 Roma, Italy; linda.maurizi@uniroma1.it (L.M.); massimiliano.marazzato@uniroma1.it (M.M.); antoniettalucia.conte@uniroma1.it (A.L.C.); catia.longhi@uniroma1.it (C.L.)

<sup>3</sup> Centro Nazionale Tecnologie Innovative in Sanità Pubblica, Istituto Superiore di Sanità, viale Regina Elena, 299, 00162 Rome, Italy; maria.ammendolia@iss.it

\* Correspondence: maria.ammendolia@iss.it (M.G.A.); carlotta.marianecchi@uniroma1.it (C.M.)

† These authors equally contributed to the work.

**Citation:** Rinaldi, F.; Maurizi, L.; Forte, J.; Marazzato, M.; Hanieh, P.N.; Conte, A.L.; Ammendolia, M.G.; Marianecchi, C.; Carafa, M.; Longhi, C. Resveratrol-Loaded Nanoemulsions: In Vitro Activity on Human T24 Bladder Cancer Cells. *Nanomaterials* **2021**, *11*, 1569. <https://doi.org/10.3390/nano11061569>

Academic Editor(s): Eleonore Fröhlich; Luciana Dini; Cristian Vergallo

Received: 13 May 2021  
Accepted: 10 June 2021  
Published: 15 June 2021

**Publisher's Note:** MDPI stays neutral with regard to jurisdictional claims in published maps and institutional affiliations.

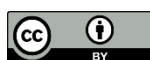

**Copyright:** © 2021 by the authors. Submitted for possible open access publication under the terms and conditions of the Creative Commons Attribution (CC BY) license (<http://creativecommons.org/licenses/by/4.0/>).

**Table 1.** Composition of all studied formulations in the ternary diagram; in bold, sample composition of the dark region.

| Neem (g) | Tween 20 (g) | Hepes Buffer (g) | Neem (%w/w) | Tween 20 (%w/w) | Hepes Buffer (%w/w) |
|----------|--------------|------------------|-------------|-----------------|---------------------|
| 1        | 1            | 98               | 1           | 1               | 98                  |
| 2        | 2            | 96               | 2           | 2               | 96                  |
| 5        | 10           | 85               | 5           | 10              | 85                  |
| 5        | 20           | 75               | 5           | 20              | 75                  |
| 5        | 30           | 65               | 5           | 30              | 65                  |
| 5        | 40           | 55               | 5           | 40              | 55                  |
| 5        | 50           | 45               | 5           | 50              | 45                  |
| 6        | 55           | 39               | 6           | 55              | 39                  |
| 15       | 40           | 45               | 15          | 40              | 45                  |
| 20       | 45           | 35               | 20          | 45              | 35                  |
| 30       | 30           | 40               | 30          | 30              | 40                  |
| 43       | 17           | 40               | 43          | 17              | 40                  |
| 20       | 25           | 55               | 20          | 25              | 55                  |
| 15       | 15           | 70               | 15          | 15              | 70                  |
| 10       | 10           | 80               | 10          | 10              | 80                  |
| 30       | 15           | 55               | 30          | 15              | 55                  |
| 30       | 5            | 65               | 30          | 5               | 65                  |
| 43       | 17           | 40               | 43          | 17              | 40                  |
| 45       | 5            | 50               | 45          | 5               | 50                  |
| 55       | 5            | 40               | 55          | 5               | 40                  |
| 70       | 5            | 25               | 70          | 5               | 25                  |
| 65       | 15           | 20               | 65          | 15              | 20                  |
| 55       | 12           | 33               | 55          | 12              | 33                  |
| 43       | 17           | 40               | 43          | 17              | 40                  |
| 63       | 5            | 32               | 63          | 5               | 32                  |
| 62       | 12           | 26               | 62          | 12              | 26                  |
| 43       | 12           | 45               | 43          | 12              | 45                  |
| 27       | 25           | 48               | 27          | 25              | 48                  |
| 23       | 35           | 42               | 23          | 35              | 42                  |
| 75       | 5            | 20               | 75          | 5               | 20                  |
| 70       | 12           | 18               | 70          | 12              | 18                  |
| 55       | 30           | 15               | 55          | 30              | 15                  |
| 40       | 40           | 20               | 40          | 40              | 20                  |
| 35       | 38           | 27               | 35          | 38              | 27                  |
| 30       | 48           | 22               | 30          | 48              | 22                  |
| 20       | 58           | 22               | 20          | 58              | 22                  |
| 10       | 55           | 35               | 10          | 55              | 35                  |
| 2        | 68           | 30               | 2           | 68              | 30                  |
| 10       | 50           | 40               | 10          | 50              | 40                  |
| 38       | 22           | 40               | 38          | 22              | 40                  |
| 30       | 40           | 30               | 30          | 40              | 30                  |
| 32       | 32           | 36               | 32          | 32              | 36                  |
| 45       | 30           | 25               | 45          | 30              | 25                  |
| 45       | 25           | 30               | 45          | 25              | 30                  |
| 55       | 20           | 25               | 55          | 20              | 25                  |
| 65       | 15           | 20               | 65          | 15              | 20                  |
| 70       | 20           | 10               | 70          | 20              | 10                  |

|    |    |    |    |    |    |
|----|----|----|----|----|----|
| 20 | 52 | 28 | 20 | 52 | 28 |
| 8  | 62 | 30 | 8  | 62 | 30 |
| 25 | 55 | 20 | 25 | 55 | 20 |
| 85 | 5  | 10 | 85 | 5  | 10 |
| 75 | 15 | 10 | 75 | 15 | 10 |
| 65 | 25 | 10 | 65 | 25 | 10 |
| 55 | 35 | 10 | 55 | 35 | 10 |
| 55 | 40 | 5  | 55 | 40 | 5  |
| 45 | 50 | 5  | 45 | 50 | 5  |
| 20 | 70 | 10 | 20 | 70 | 10 |
| 10 | 65 | 25 | 10 | 65 | 25 |
| 5  | 75 | 20 | 5  | 75 | 20 |
| 30 | 60 | 10 | 30 | 60 | 10 |
| 35 | 50 | 15 | 35 | 50 | 15 |
| 15 | 80 | 5  | 15 | 80 | 5  |
| 5  | 90 | 5  | 5  | 90 | 5  |
| 32 | 41 | 26 | 32 | 41 | 26 |
| 14 | 62 | 24 | 14 | 62 | 24 |
| 47 | 40 | 13 | 47 | 40 | 13 |
| 90 | 5  | 5  | 90 | 5  | 5  |
| 5  | 80 | 15 | 5  | 80 | 15 |
| 2  | 96 | 2  | 2  | 96 | 2  |

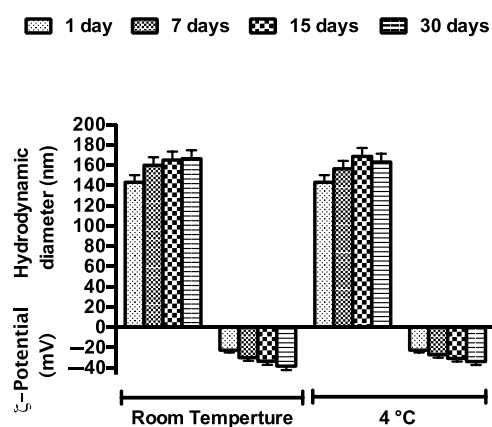

**Figure S1.** Stability studies of NT in terms of variation of hydrodynamic diameter and  $\zeta$ -potential up to 30 days at two different storage temperatures.

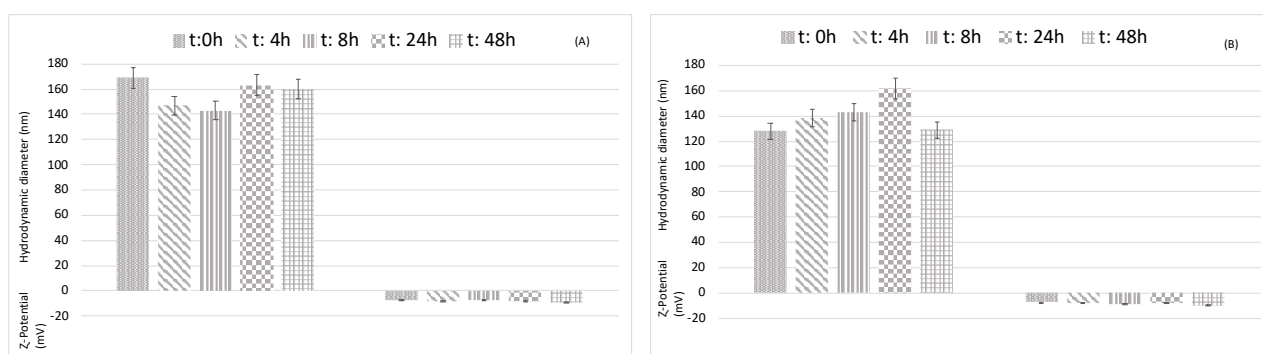

**Figure S2.** Biological stability studies of NR (A) and NT (B) in terms of variation of hydrodynamic diameter and  $\zeta$ -potential up to 48 h at the temperature of 37 °C. .
